# Supplementary material for: CXCR2 Small-Molecule Antagonist Combats Chemoresistance and Enhances Immunotherapy in Triple-Negative Breast Cancer
Source: PubMed Central journal article supplement (PMC9065340; doi:10.3389/fphar.2022.862125), 2022-04-20
Supplement: DataSheet1.pdf [file DataSheet1.pdf]

## Supplementary Data

### Supplementary figures:

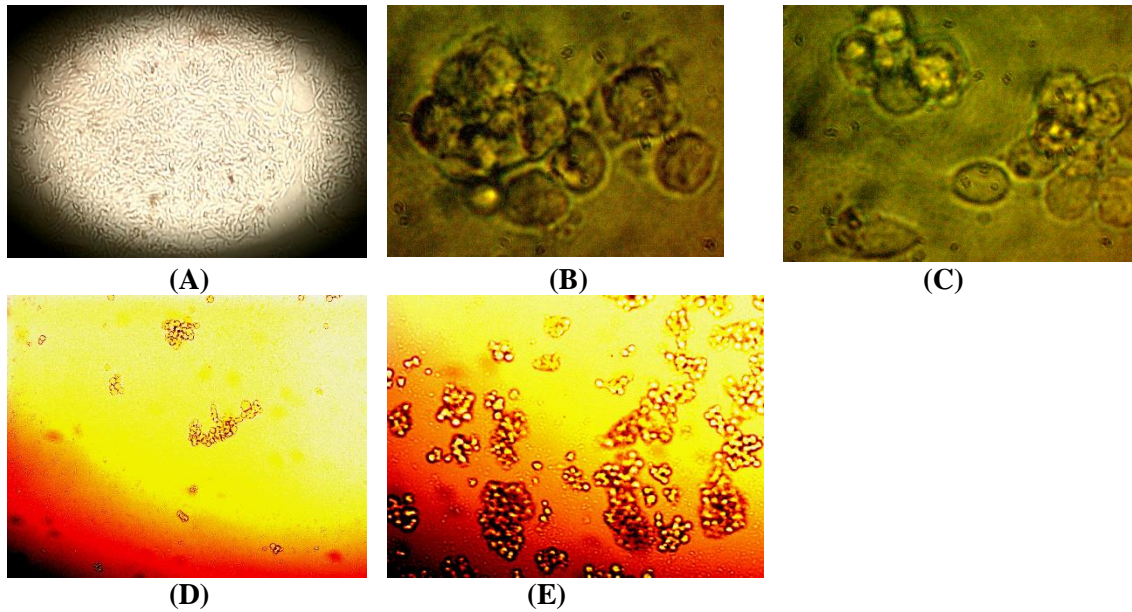

Figure 1 3D Morphological Characteristics of Mammospheres generated from MDA-MB231 Cell line

A) MDA-MB231 cell line, captured by confocal light microscope, lens 10X.

B, C) MDA-MB231 mammospheres, captured by confocal light microscope, lens 40X.

D, E) MDA-MB231 mammospheres captured by confocal light microscope, lens 20X.

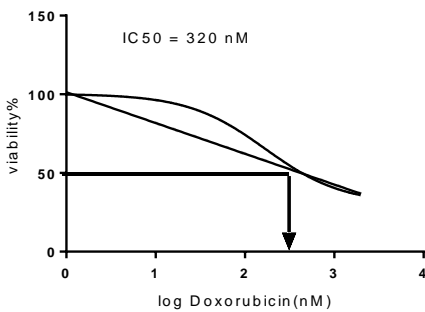

(A)

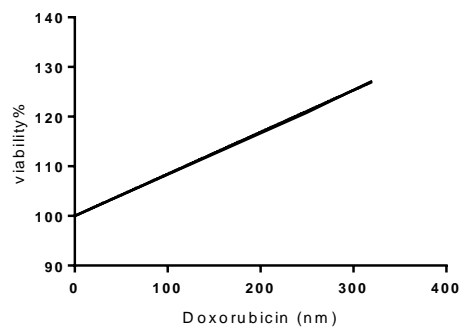

(B)

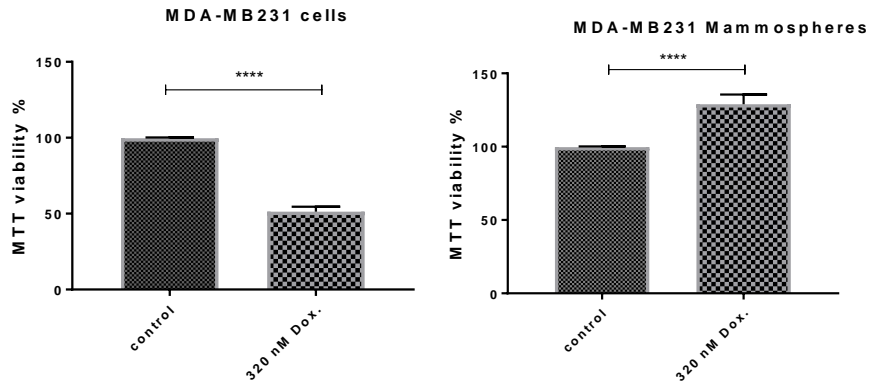

(C)

(D)

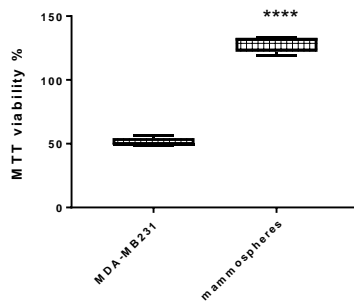

(E)

Figure 2 Comparing the Chemosensitivity Response to Doxorubicin in MDA-MB231 Cell line and Mammospheres.

- A) MTT assay for determining the inhibitory concentration (IC<sub>50</sub>) of Doxorubicin in MDA-MB231 Cells. IC<sub>50</sub> was calculated after plotting log of the concentrations on the x-axis while the viability percentage was plotted on the Y-axis, data was fit with nonlinear regression Curve fit.
- B) MTT assay for examining the viability in mammospheres post-treatment with step-wise concentrations of Doxorubicin 250-2000 nM (not all doses are shown), data was fit using linear regression Analysis.
- C) Compared viability of non-treated and 320 nM Doxorubicin treated MDA-MB231 cells, P values unpaired student's t-test.
- D) Compared viability of non-treated and 320 nM Doxorubicin treated MDA-MB231 mammospheres, P values unpaired student's t-test.
- E) Viability in MDA-MB231 cells post-treatment with 320 nM Doxorubicin is compared to the viability of mammospheres treated with the same dose of the drug P values unpaired student's t-test.

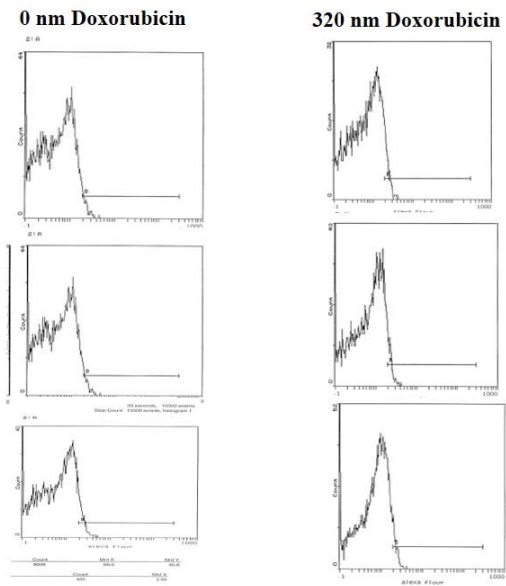

(A)

| 0 nm Doxorubicin | Hist | Region ID | %    | Count | Mnl X |
|------------------|------|-----------|------|-------|-------|
|                  | 2    | B B       | 3.74 | 363   | 2.50  |

(B)

| 320 nm Doxorubicin | Hist | Region ID | %    | Count | Mnl X |
|--------------------|------|-----------|------|-------|-------|
|                    | 2    | B B       | 5.23 | 430   | 2.40  |

Figure 3 Doxorubicin Induces Higher CXCR2 Expression level in MDA-MB-231 Mammospheres.(flow cytometric charts)

- A) Flow Charts for CXCR2 expression in mammospheres.
- B) CXCR2 percentages obtained from flow cytometric analysis.

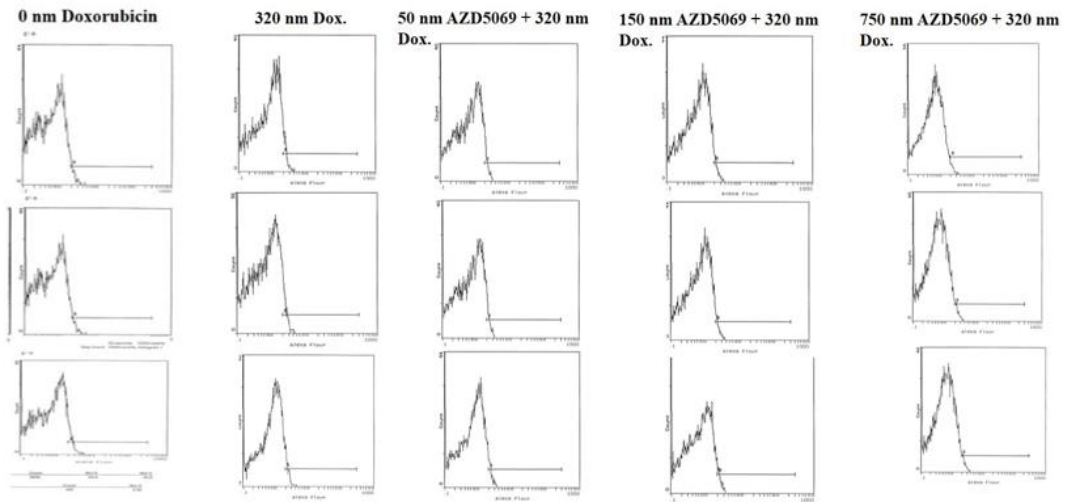

| Treatment                   | Hist | Region ID | %    | Count | Mnl X |
|-----------------------------|------|-----------|------|-------|-------|
| 0 nm Doxorubicin            | 2    | B B       | 3.74 | 363   | 2.50  |
| 0 nm AZD5069+ 320 nm Dox.   | 2    | B B       | 4.73 | 408   | 2.39  |
| 50 nm AZD5069+ 320 nm Dox.  | 2    | B B       | 3.16 | 273   | 2.61  |
| 150 nm AZD5069+ 320 nm Dox. | 2    | B B       | 2.95 | 258   | 2.38  |
| 750 nm AZD5069+ 320 nm Dox. | 2    | B B       | 1.59 | 148   | 2.46  |

Figure 4 AZD5069 inhibits Doxorubicin mediated CXCR2 overexpression and restores primary levels of the receptor

- (A) Flow Charts for CXCR2 expression in mammospheres.
- (B) CXCR2 percentages obtained from flow cytometric analysis.

(A)

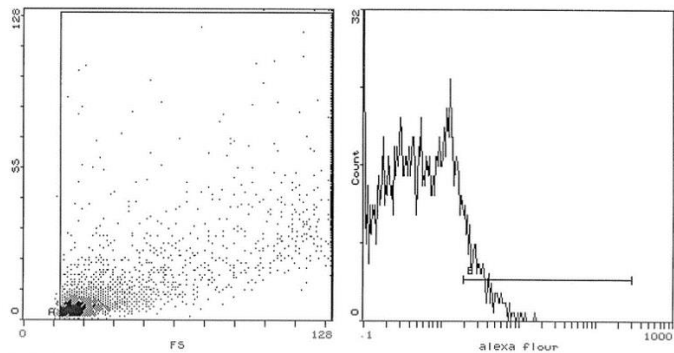

(B)

| Hist | Region ID | %    | Count | Mnl X |
|------|-----------|------|-------|-------|
| 2    | B B       | 9.56 | 755   | 3.96  |

Figure 5 CXCR2 Expression level in MDA-MB-231 Cells

- A) Flow Charts for CXCR2 expression in MDA-MB-231 Cells.
- B) CXCR2 percentages obtained from flow cytometric analysis.
